# Supplementary material for: Vestibular and Ocular Motor Properties in Lateral Medullary Stroke Critically Depend on the Level of the Medullary Lesion
Source: PubMed Central journal article supplement (PMC7325917; doi:10.3389/fneur.2020.00390), 2020-06-05

## **Supplementary material**

Figure S1:

Axial diffusion-weighted (#2-12, #14-17) or T2-weighted (#1 and 13) MR-images at the level of the caudal (left column), middle (middle column) and rostral (right column) medulla are shown.

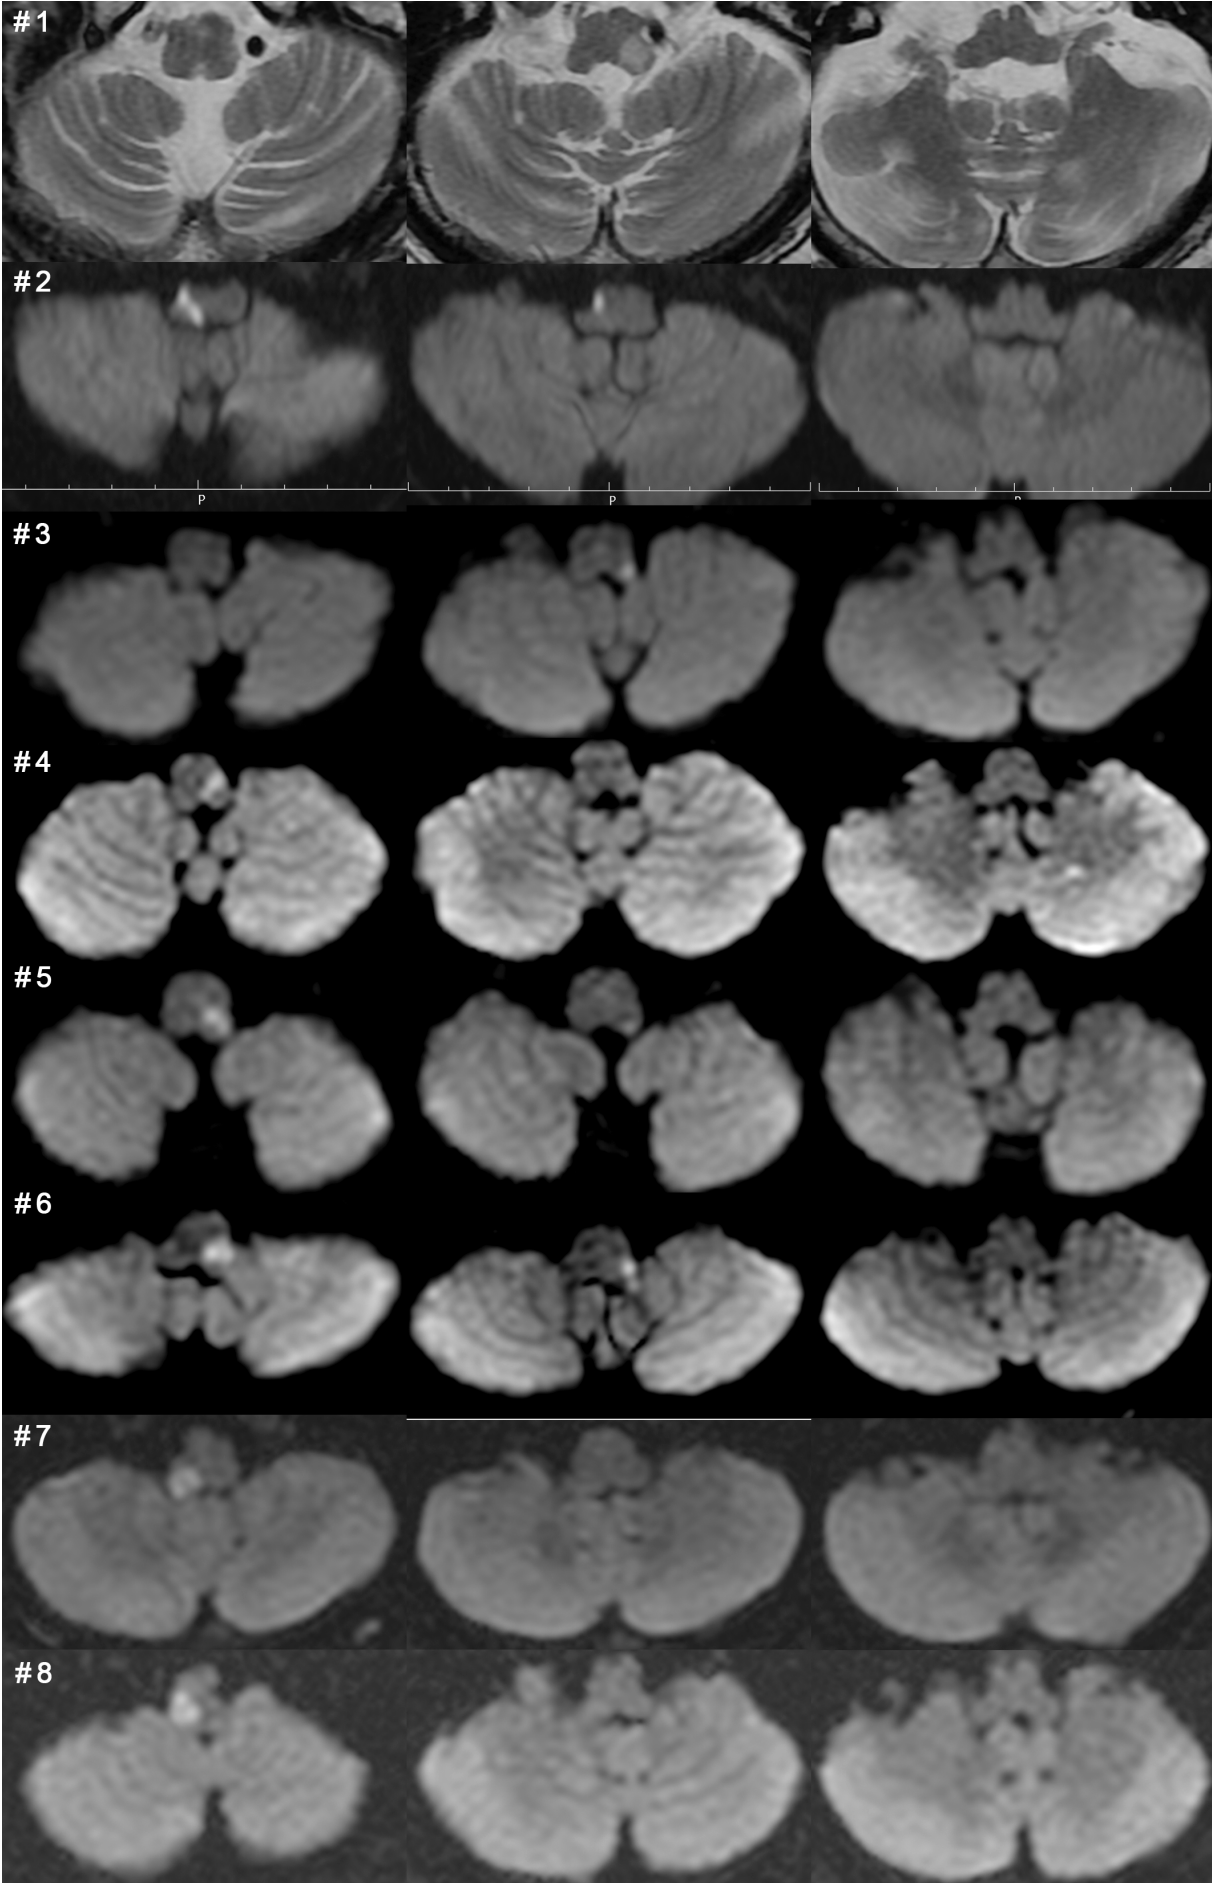

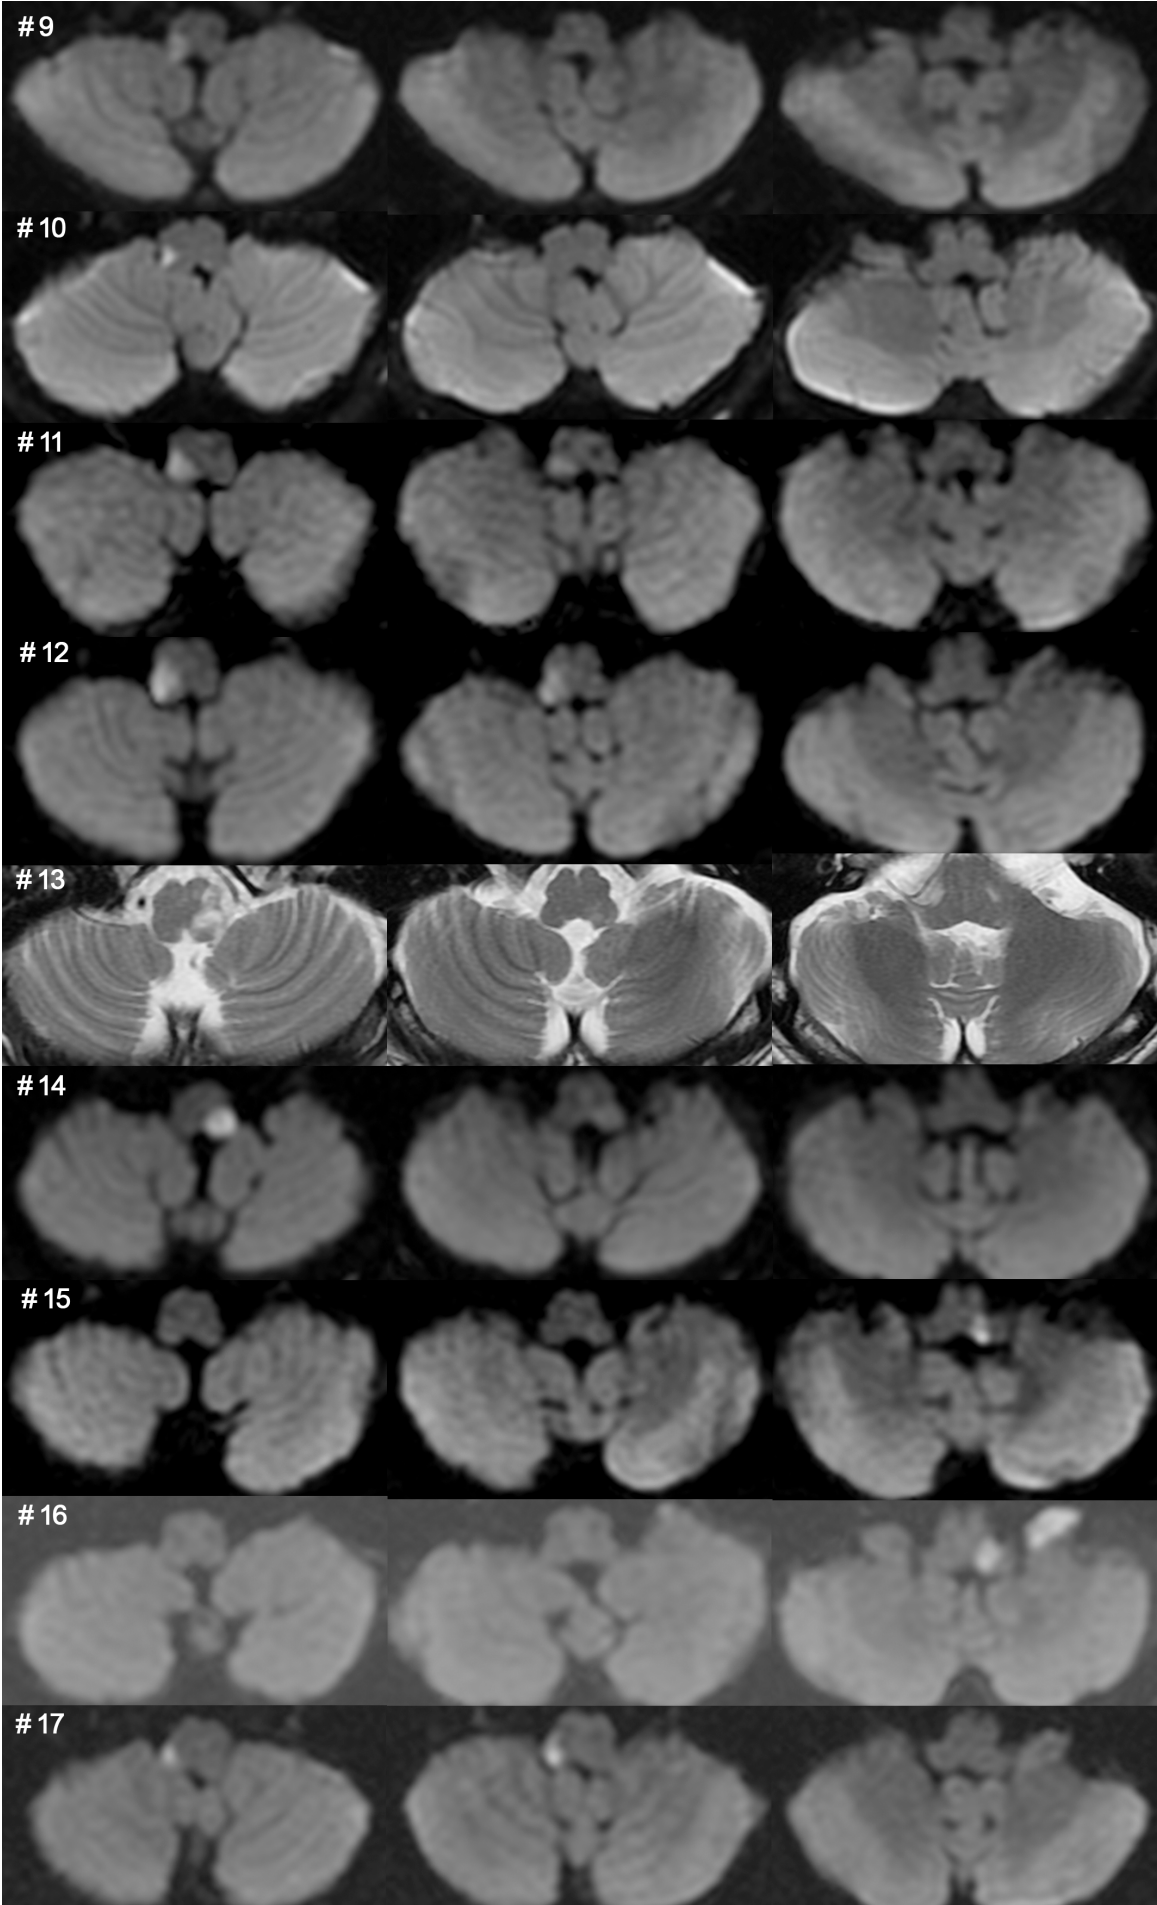

Supplement: Data_Sheet_1.pdf [file Data_Sheet_1.pdf]
